# Supplementary material
Source: publisher figshare collection journal article supplement (https://acs.figshare.com/ndownloader/files/34335100)
Supplement: Supplementary file 1 [file 34335100]

# Supporting Information

## Manganese Oxide/iron Carbide Encapsulated in Nitrogen and Boron Co-doped Carbon Nanowire Networks as The Accelerated Alkaline Hydrogen Evolution and Oxygen Reduction Bi-functional Electrocatalysts

Zhuo Liu,<sup>a</sup> Fei Guo,<sup>a</sup> Lina Han,<sup>b</sup> Jie Xiao,<sup>a</sup> Xiaoyuan Zeng,<sup>a</sup> Chengxu Zhang,<sup>a</sup> Peng Dong,<sup>a</sup> Mian Li,<sup>\*a</sup> Yingjie Zhang,<sup>\*a,b</sup>

<sup>a</sup> *National and Local Joint Engineering Laboratory for Lithium-ion Batteries and Materials Preparation Technology, Key Laboratory of Advanced Battery Materials of Yunnan Province, Faculty of Metallurgical and Energy Engineering, Kunming University of Science and Technology, Kunming 650093, PR China*

<sup>b</sup> *Faculty of Material Science and Engineering, Kunming University of Science and Technology, Kunming 650093, China*

\* Corresponding author.

E-mail addresses: mianzi2009@126.com, lim148@kmust.edu.cn (M. Li);  
zyjkmust@126.com (Y. Zhang)

## 1. Experimental Section

### *1.1. The detailed conditions for electrospinning.*

For the electrospinning, all as-obtained precursor slurries were loaded into the plastic syringes with the inner diameter of pinhead is 0.80 mm. the voltage applied for electrospinning was 23 kV and the flow rates of precursor slurries are controlled as 1 mL h<sup>-1</sup> by using the pump. The stainless steel mesh was used to collect the precursor networks. The distance between the orifices and the stainless steel mesh electrodes were all controlled as ~15 cm. The as-electrospun precursor networks were then calcinated at different temperatures for 2 h in nitrogen atmosphere.

### *1.2. Synthesis of the precursor networks for Fe@BNPCFs-900 and Mn@BNPCFs-900 samples.*

For comparison, the Fe@BNPCFs-900 and Mn@BNPCFs-900 samples have been prepared as well. 3.3 g of PVP powder and 1.0 g of HA were first dissolved into 40.0 mL DMF to produce the HA-PVP-DMF solution. Then, 1.40 g Fe(AC)<sub>2</sub>·4H<sub>2</sub>O or 1.52 g Mn(AC)<sub>2</sub>·2H<sub>2</sub>O were severally added into the as-prepared HA-PVP-DMF solutions. The obtained mixtures were further stirred for another 12 h to acquire the homogeneous precursor slurries [i.e., Fe(AC)<sub>2</sub>-HA-PVP-DMF and Mn(AC)<sub>2</sub>-HA-PVP-DMF]. Following closely, the electrospinning technique was utilized for weaving the Fe(AC)<sub>2</sub>-HA-PVP-DMF and Mn(AC)<sub>2</sub>-HA-PVP-DMF precursor slurries into the Fe(AC)<sub>2</sub>/HA/PVP and Mn(AC)<sub>2</sub>/HA/PVP precursor networks.

### *1.3. Physical characterization of precursor networks, FeMn@BNPCFs-T (T= 600, 700, 800, 900 and 1000 °C), Fe@BNPCFs-900 and Mn@BNPCFs-900 control samples.*

The scanning electron microscopy (SEM) was performed using a Philips XL-30 ESEM equipped with an energy-dispersive X-ray spectroscopy (EDS) analyzer. The transmission electron microscopy (TEM), high-angle annular dark field scanning transmission electron microscopy (HAADF) and scanning transmission electron microscopy (STEM) were performed on a high-resolution Hitachi JEM-2100 system equipped with an EDX analyzer. The wide-angle X-ray diffraction (XRD) patterns were obtained on an X-ray D/max-2200 vpc (Rigaku Corporation, Japan) instrument operated at 40 kV and 20 mA using Cu K $\alpha$  radiation ( $\lambda$  0.15406 nm). The N<sub>2</sub> adsorption-desorption isotherms were performed on an ASAP 2020 (Micromeritics, USA). Before the measurements, the samples were degassed in vacuum at 120 °C for 5 h. The Brunauer-Emmett-Teller (BET) method was utilized to calculate the BET specific surface area using adsorption data. The pore size distribution was derived from the adsorption branch by using the Barrett-Joyner-Halenda (BJH) model. The Raman spectroscopy patterns were obtained using a confocal microprobe Raman system (HR 800, JobinYvon). The surface analyses of catalysts were carried out by X-ray photoelectron spectroscopy (XPS) on an ESCA LAB spectrometer (USA) using a monochromatic Al K $\alpha$  source ( $h\nu$  1486.6 eV). The binding energies were calibrated by using the containment carbon (C1s 284.6 eV). The Fe and Mn contents along catalyst's surfaces were determined by inductively coupled plasma optical emission spectrometry (ICP-OES) with a PerkinElmer Optima 3300 DV spectrometer.

***1.4. Electrochemical characterization of various FeMn@BNPCFs-T (T= 600, 700, 800, 900 and 1000 °C), Fe@BNPCFs-900 and Mn@BNPCFs-900 control samples toward HER and ORR in alkaline condition.***

Electrochemical measurements were performed at room temperature by using a rotating disk electrode (RDE; 5 mm in diameter with a geometric area of 0.19625 cm<sup>2</sup>) or rotating ring-disk electrode (RRDE; 5.5 mm in diameter with a geometric area of 0.23758 cm<sup>2</sup>) as the working electrode both in 0.1 M KOH (for ORR) and 1.0 M KOH (for HER). Pt wire was used as counter electrode (for HER test, the counter electrode was carbon rod) and Ag/AgCl was used as reference electrodes. All potentials appeared in this paper are referred to reversible hydrogen electrode, the potentials recorded (referred to Ag/AgCl) in each experiment were calculated using the formula  $E_{\text{RHE}} = E_{\text{Ag/AgCl}} + 0.059 \text{ pH} + 0.197 \text{ V}$ , where  $E_{\text{RHE}}$  is a potential vs. reversible hydrogen electrode (RHE),  $E_{\text{Ag/AgCl}}$  is a potential vs. Ag/AgCl electrode, and pH is the pH value of electrolyte. All current densities are the ratios of recorded currents to the geometric area of electrode.

In order to prepare the working electrodes, 3 mg of as-synthesized catalyst powders were dispersed in 1 mL Nafion solution (0.5 wt%) with 60 min of ultrasonication to generate the homogeneous inks. Following closely, 30 uL of the dispersed slurry was transferred onto the RDE or RRDE with the catalyst loading amount of 0.306 mg cm<sup>-2</sup>. Finally, the as-prepared catalyst film was dried at room temperature.

In the electrochemical testing processes for HER and ORR, the Tafel polarization curves were plotted as potentials ( $E$  vs.  $\text{RHE}$ ) vs.  $\log |j(\text{mA cm}^{-2})|$  to get the Tafel plots for assessing the HER and ORR kinetics of the resultant catalysts. By

fitting the linear portion of the Tafel plots to the Tafel equation ( $\eta = b \log(j) + a$ ), the Tafel slopes ( $b$  values) can be obtained. All data were reported without  $iR$  compensation.

The roughness ( $R$ ) and electrochemical specific active area (ECSA) were calculated by using **Equations S1 and S2**:

$$R = C_{\text{sample}}/C_{\text{GCE}} \quad (\text{S1})$$

$$\text{ECSA} = R \times A_{\text{GCE}} \quad (\text{S2})$$

Where  $A = 0.19625 \text{ cm}^2$  in this work.

The turnover frequency (TOF) values of the optimal catalyst were calculated from the equation **S3**:

$$\text{TOF} = j \times A / (4 \times F \times m) \quad (\text{S3})$$

Where the  $j$  value is current density obtained at each potential,  $A$  is the area of the electrode,  $F$  is the Faraday constant ( $96485 \text{ C mol}^{-1}$ ), and  $m$  is the molar number of active material loaded on the electrode.

In addition, for the ORR test, in order to further verify the ORR catalytic pathways of various catalysts, we also conducted the RRDE measurements at the potential scan rate of  $5 \text{ mV s}^{-1}$  with an electrode rotation speed of 1600 rpm. Meanwhile, the operating potential of Pt ring was set at 0.5 V vs. Ag/AgCl in 0.1 M KOH for RRDE tests. The electron transfer numbers ( $n$ ) were also calculated from the **Equation S4** and the  $\text{H}_2\text{O}_2$  formation yields were calculated from the **Equation S5** based on the RRDE data:

$$n = \frac{4I_{\text{D}}}{(I_{\text{D}} + I_{\text{R}} / N)} \quad (\text{S4})$$

$$\% \text{HO}_2^- = \frac{200I_R}{(I_D N + I_R)} \quad (\text{S5})$$

Where  $N$  is the collection efficiency with a value of 0.37,  $I_D$  and  $I_R$  are the faradic-disk and -ring currents respectively.

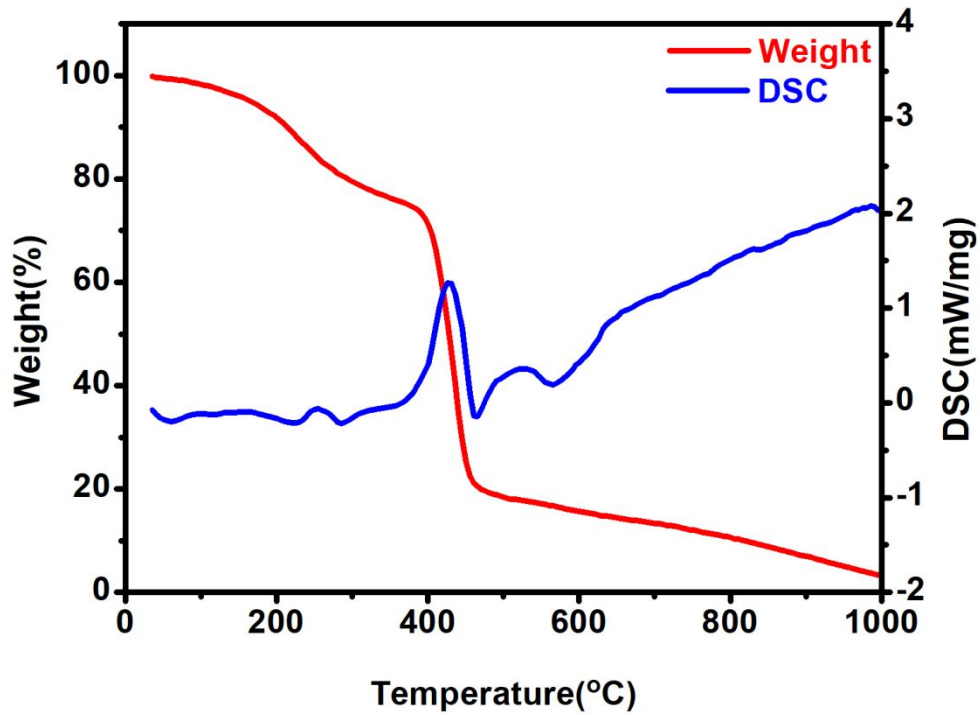

**Figure S1.** The DSC-TGA curves of the precursor networks, in the flowing of pure nitrogen with a temperature rating of 10 °C min<sup>-1</sup>.

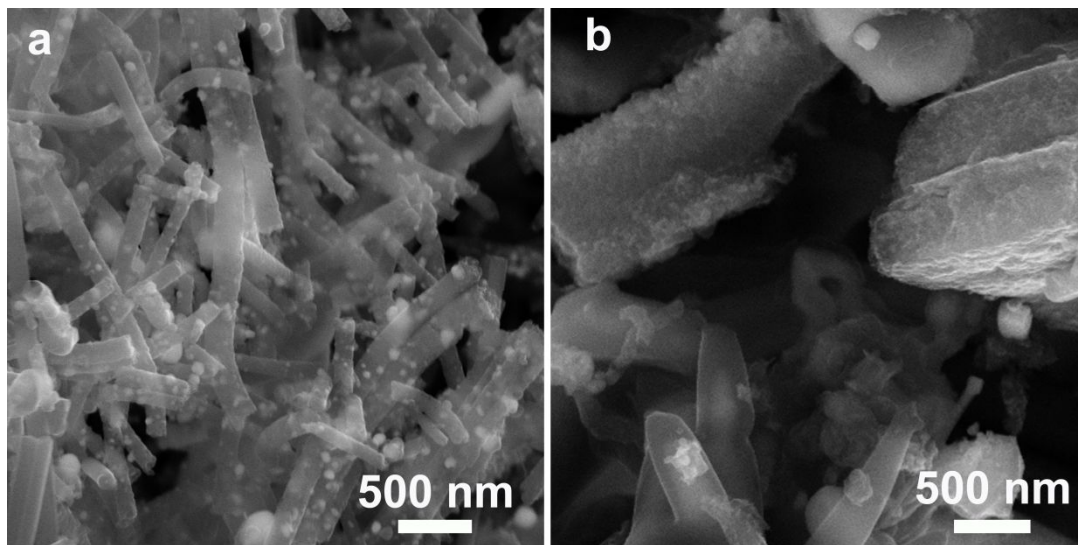

**Figure S2.** The SEM images of the Fe@BNPCFs-900 (a) and Mn@BNPCFs-900 (b)

control sample.

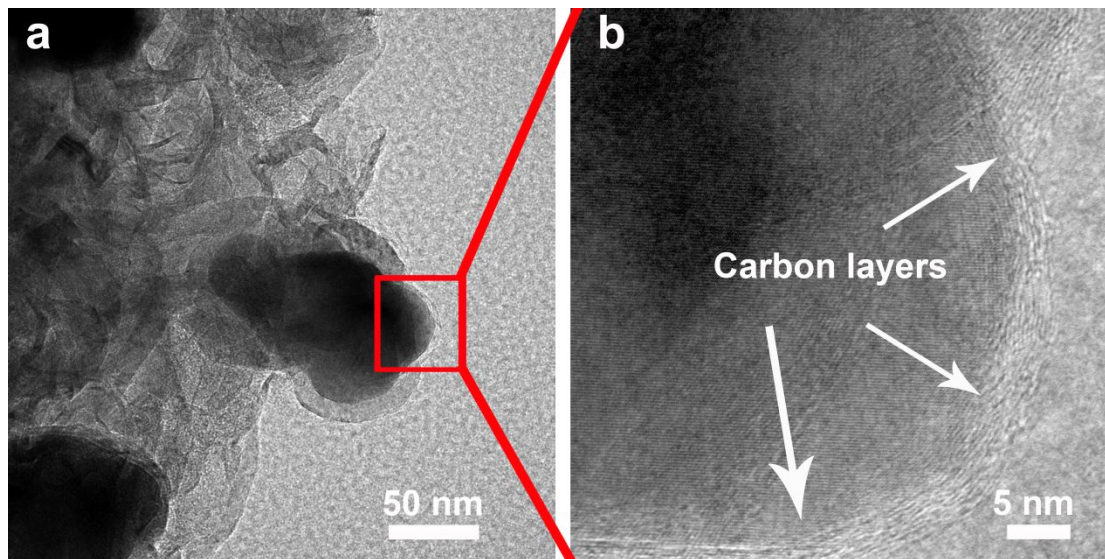

**Figure S3.** The TEM (a) and HRTEM (b) images of the FeMn@BNPCFs-900 control sample; b is the amplification of red square area showed in a.

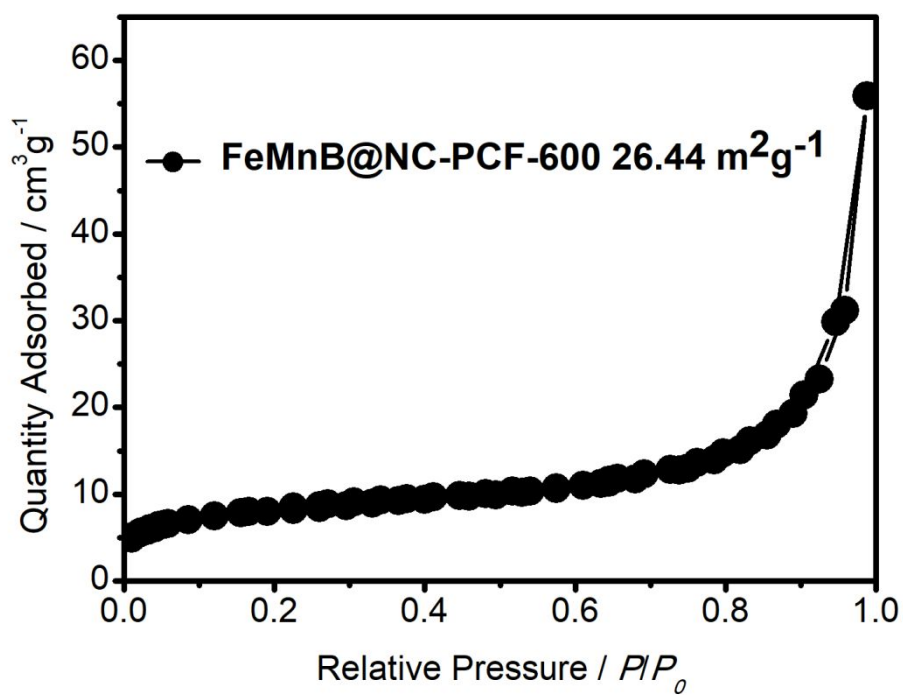

**Figure S4.** The nitrogen adsorption–desorption isotherm of the FeMn@BNPCFs-600 control sample.



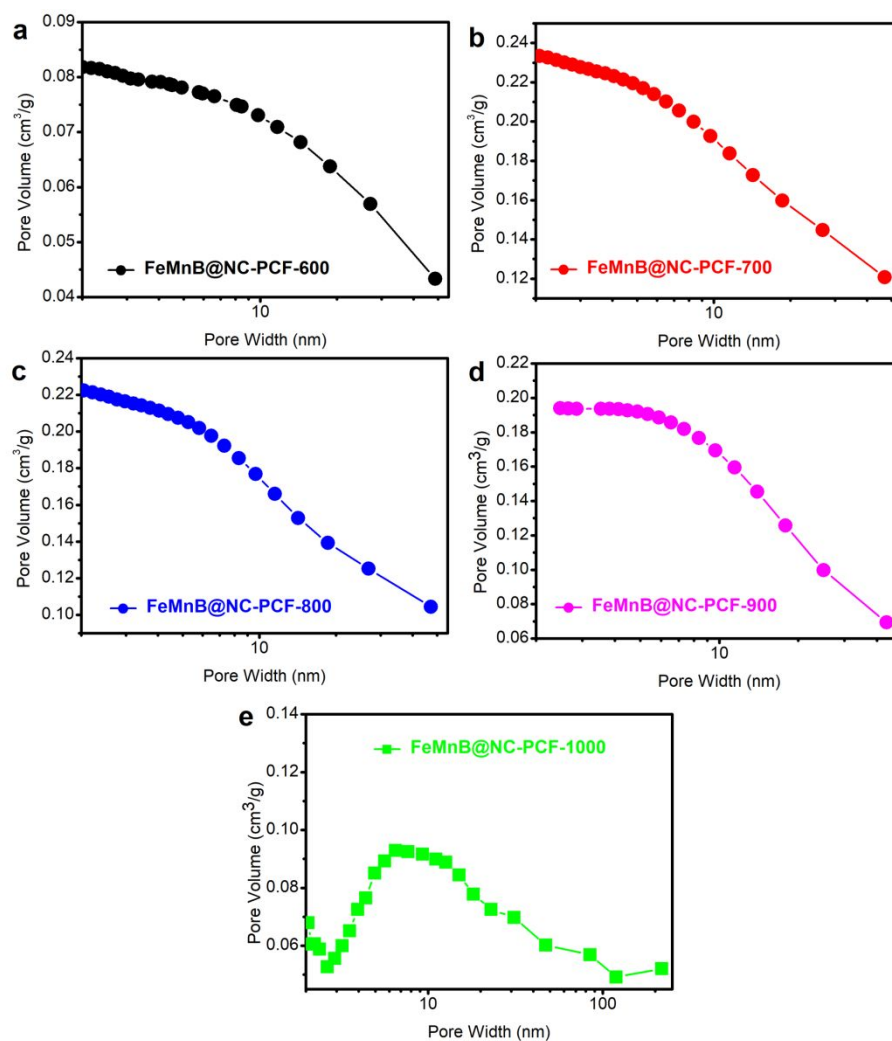

**Figure S5.** The pore size distribution plots of (a) FeMn@BNPCFs-600, (b) FeMn@BNPCFs-700, (c) FeMn@BNPCFs-800, (d) FeMn@BNPCFs-900 and (e) FeMn@BNPCFs-1000 control samples.

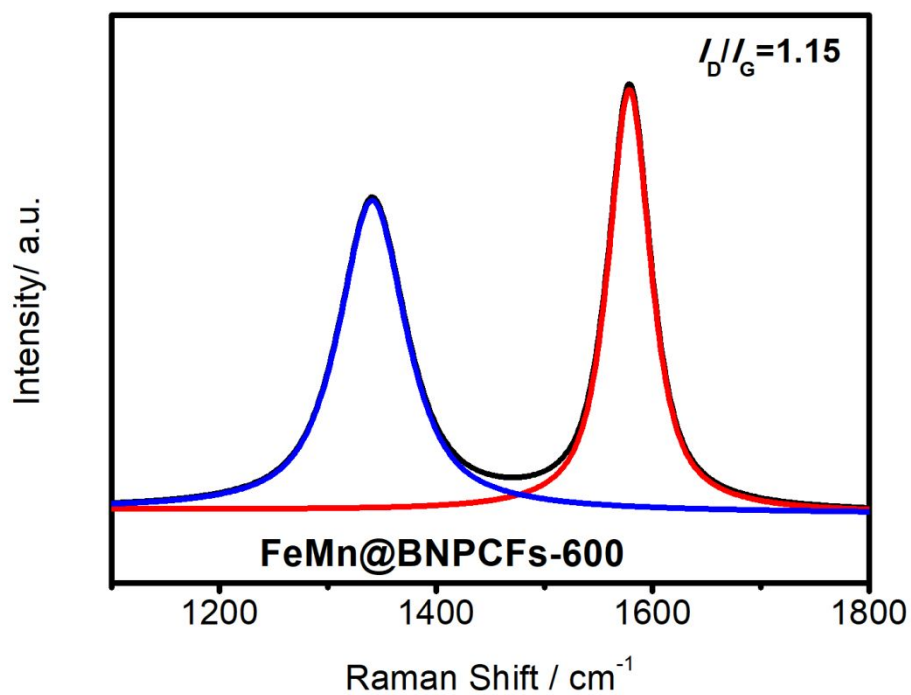

**Figure S6.** The Raman spectrum of resultant FeMn@BNPCFs-600 material.

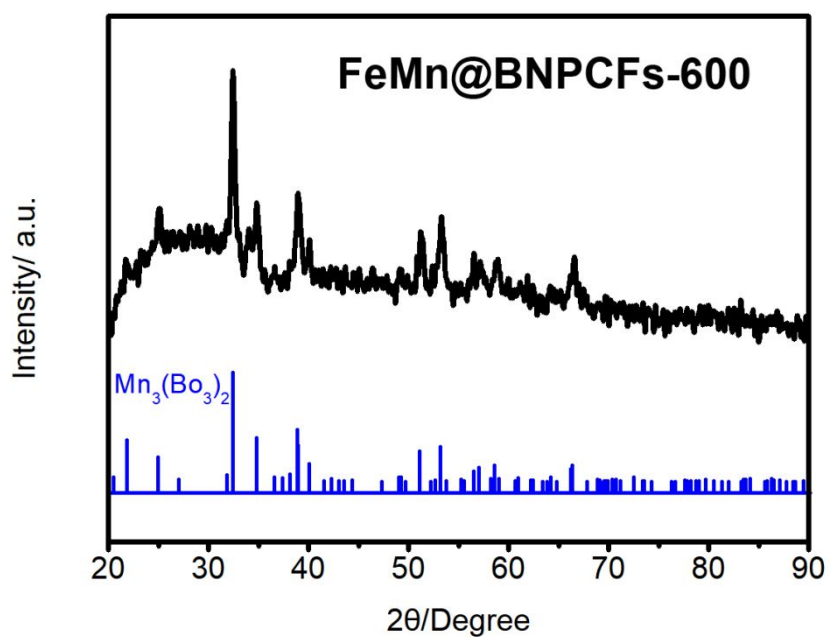

**Figure S7.** The XRD pattern of the resultant FeMn@BNPCFs-600 sample.

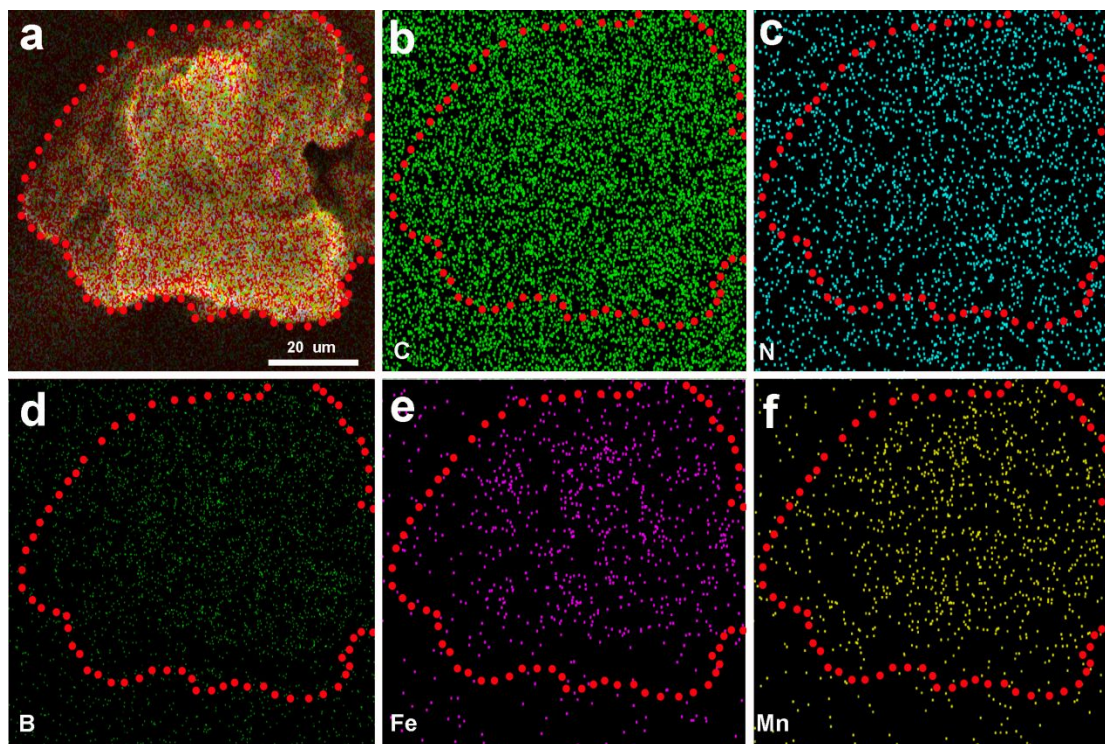

**Figure S8.** The SEM-EDX mapping of the resultant FeMn@BNPCFs-900 sample: (a) overlapped signals of each element and the distribution states of (b) C, (c) N, (d) B, (e) Fe and (f) Mn elements.

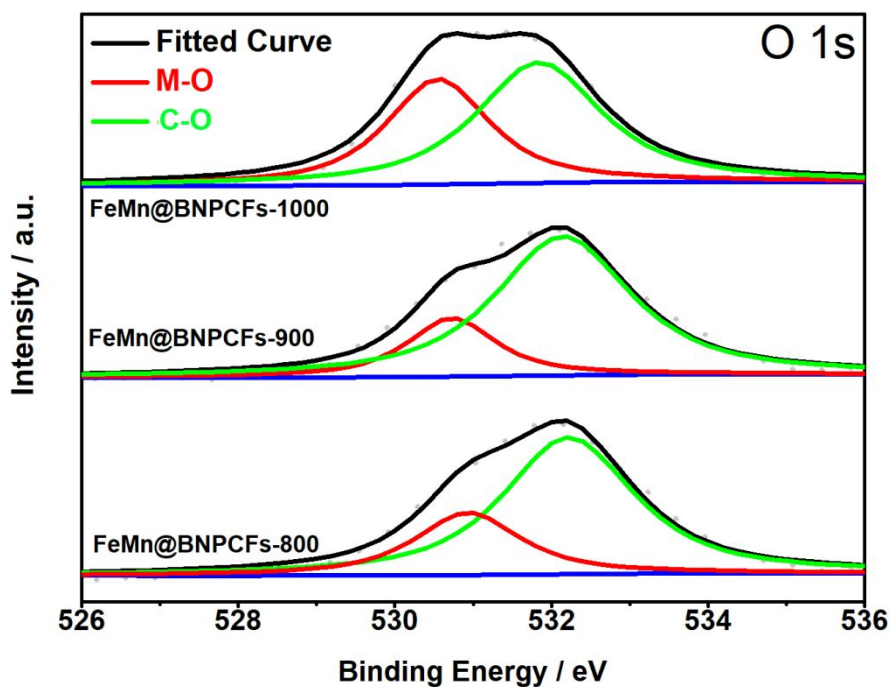

**Figure S9.** The high-resolution O 1s spectra of resultant FeMn@BNPCFs-800, FeMn@BNPCFs-900 and FeMn@BNPCFs-1000 materials.

**Table S1** A comparison on HER catalytic data between our catalysts and other reported non-precious metal based HER catalysts.

| Catalysts                              | $\eta_{10}$<br>(mv) | $\eta_{onset}$<br>(mv) | Tafel Slope<br>(mV dec <sup>-1</sup> ) | Catalyst<br>Loading<br>(g cm <sup>-2</sup> ) | Medium                              | References                                                       |
|----------------------------------------|---------------------|------------------------|----------------------------------------|----------------------------------------------|-------------------------------------|------------------------------------------------------------------|
| FeMn@BNPCFs-600                        | 431                 | 203                    | 226.94                                 | 0.306                                        | 1 M KOH                             | This work                                                        |
| FeMn@BNPCFs-700                        | 383                 | 155                    | 212.81                                 | 0.306                                        | 1 M KOH                             |                                                                  |
| FeMn@BNPCFs-800                        | 311                 | 97                     | 127.69                                 | 0.306                                        | 1 M KOH                             |                                                                  |
| FeMn@BNPCFs-900                        | 247                 | 49                     | 104.89                                 | 0.306                                        | 1 M KOH                             |                                                                  |
| FeMn@BNPCFs-1000                       | 325                 | 126                    | 130.51                                 | 0.306                                        | 1 M KOH                             |                                                                  |
| Fe-promoted MoP                        | 195                 | 150                    | 49                                     | 0.071                                        | 0.5 MH <sub>2</sub> SO <sub>4</sub> | <i>Appl. Catal. A-Gen.</i> <b>2016</b> , 524, 134-138            |
| 0.05Mn-MoP                             | 199                 | 210                    | 49                                     | 0.46                                         | 0.5 MH <sub>2</sub> SO <sub>4</sub> | <i>App. Surf. Sci.</i> <b>2021</b> , 551, 149321                 |
| MnFeO-NF-0.8                           | 186                 | 172                    | 74                                     | 0.46                                         | 1 M KOH                             | <i>Nanoscale</i> , <b>2020</b> , 12, 19992                       |
| NiFeMn-LTH/FM-NS<br>/NF-4              | 110                 | 191                    | 80                                     | 0.46                                         | 1 M KOH                             | <i>Nanoscale</i> , <b>2019</b> , 11, 20797                       |
| Mn-FeP                                 | 175                 | 153                    | 103.6                                  | -                                            | 0.5 MH <sub>2</sub> SO <sub>4</sub> | <i>App. Surf. Sci.</i> <b>2020</b> , 510, 145427                 |
| NiFe LDH/NF                            | 210                 | 190                    | 58.9                                   | -                                            | 1 M KOH                             | <i>Science</i> <b>2014</b> , 345, 1593                           |
| Fe <sup>13+</sup> -WS <sub>2</sub> /CC | 160                 | 176                    | 77.3                                   | -                                            | 0.5 M HCl                           | <i>FlatChem</i> <b>2021</b> , 27, 100247                         |
| Fe <sub>2</sub> P                      | 300                 | 201                    | 126                                    | -                                            | 1 M KOH                             | <i>ACS. Appl. Mater. Interfaces</i> <b>2016</b> , 8, 12798–12803 |
| Ni-Fe-Mn                               | 68                  | -                      | 64                                     | 0.46                                         | 1 M KOH                             | <i>Int. J. Hydrogen Energ.</i> <b>2020</b> , 45, 24670-24683     |
| Fe-Ni@NCF                              | 219                 | 207                    | 79.1                                   | -                                            | 1 M KOH                             | <i>Int. J. Hydrogen Energ.</i> <b>2020</b> , 45, 12237-12243.    |
| FeP/NF                                 | 157                 | -                      | 97                                     | 1                                            | 1 M KOH                             | <i>Chem. Sci.</i> <b>2018</b> , 9, 8590-8597.                    |
| Mesoporous Mn-FeP                      | 173                 | -                      | 95                                     | 0.51                                         | 1 M KOH                             | <i>ACS Sustainable Chem. Eng.</i> <b>2019</b> , 7, 12419–12427   |
| FeP/NCNSs                              | 205                 |                        | 70                                     | 0.6                                          | 1 M KOH                             | <i>ACS Sustainable Chem. Eng.</i> <b>2018</b> , 6, 11587-11594.  |
| P-FeMnO <sub>x</sub>                   | 97                  | 150                    | 126.8                                  | -                                            | 1 M KOH                             | <i>ACS Sustainable Chem. Eng.</i> <b>2021</b> , 9, 5963–5971     |
| Cu@Mn(OH) <sub>2</sub>                 | 248                 | 182                    | 184                                    | -                                            | 1 M KOH                             | <i>Nano Research</i> <b>2018</b> , 11, 1798–1809                 |
| Fe-H <sub>2</sub> cat                  | -                   | 343                    | 77                                     | -                                            | 1 M KOH                             | <i>Chem</i> <b>2018</b> , 4, 1139-1152                           |
| Fe/P/C0.5-800                          | 256                 | 110                    | 53.6                                   | 0.46                                         | 1 M KOH                             | <i>Nano Energy</i> <b>2017</b> , 33, 221-228                     |
| Fe@C-SN/50                             | 550                 | 358                    | 123                                    | 0.55                                         | 1 M KOH                             | <i>Energy Fuels.</i> <b>2021</b> , 35, 16046–16053               |
| Fe@N-C/RGO                             | 400                 | 248                    | 100                                    | -                                            | 1 M KOH                             | <i>Faraday Discuss.</i> <b>2014</b> , 176, 135-151               |
| Porous FeP<br>nanosheets               | 253                 | 100                    | 67                                     | -                                            | 1 M KOH                             | <i>Chem. Commun.</i> <b>2013</b> , 49, 6656                      |



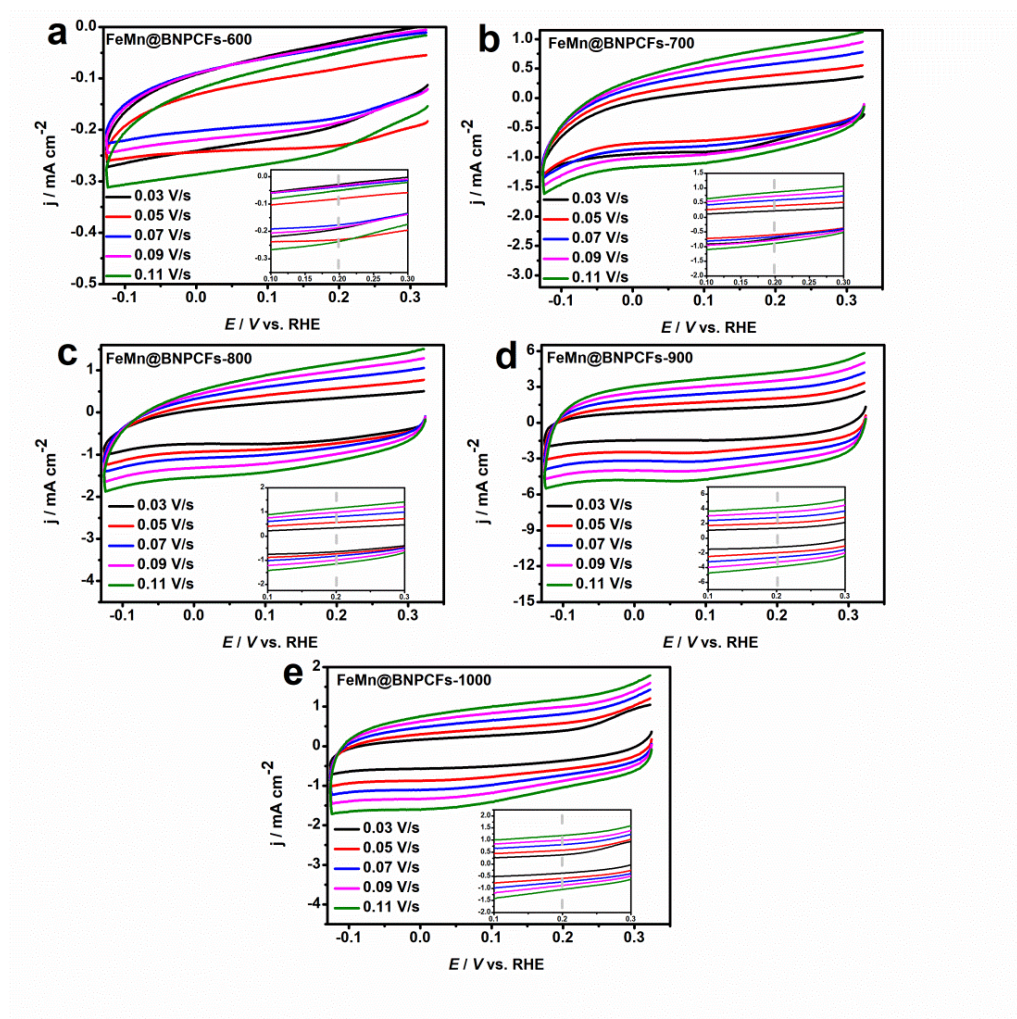

**Figure S10.** CV curves recorded at different potential scanning rates from 30 to 110  $\text{mV s}^{-1}$  in 1.0 M KOH solution (between -0.15 V vs. RHE and + 0.35 V vs. RHE) for the FeMn@BNPCFs-600 (a), FeMn@BNPCFs-700 (b), FeMn@BNPCFs-800 (c), FeMn@BNPCFs-900 (d) and FeMn@BNPCFs-1000 (e) samples.

**Table S2**  $C$ , roughness ( $R$ ), and electrochemical specific active area (ECSA) values for the catalysts modified electrodes and bare RDE. The  $R$  and ECSA values were calculated by using **Equations S1 and S2**.

| Electrodes       | $C$<br>( $\text{mF cm}^{-2}$ ) | $R$   | ECSA<br>( $\text{cm}^2$ ) |
|------------------|--------------------------------|-------|---------------------------|
| Bare GCE         | 1.139                          | -     | -                         |
| FeMn@BNPCFs-600  | 1.56                           | 1.37  | 0.27                      |
| FeMn@BNPCFs-700  | 10.75                          | 9.44  | 1.85                      |
| FeMn@BNPCFs-800  | 18.35                          | 16.11 | 3.16                      |
| FeMn@BNPCFs-900  | 68.96                          | 60.54 | 11.88                     |
| FeMn@BNPCFs-1000 | 16.68                          | 14.64 | 2.87                      |

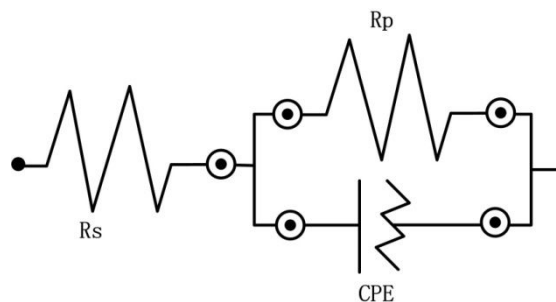

**Figure S11.** The equivalent electrical circuit utilized for fitting the electrochemical impedance spectra showed in **Figure 7e**.

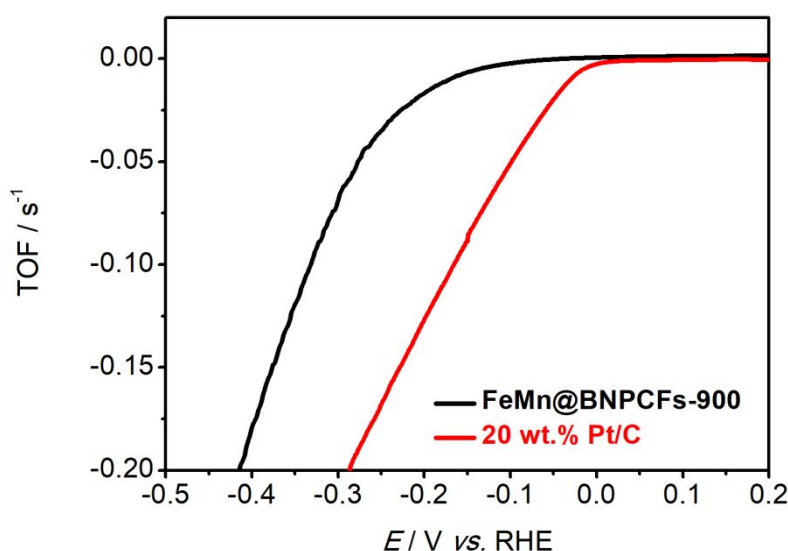

**Figure S13.** TOF values for the HER calculated at potentials between -0.5 and 0.20 V vs. RHE for 20 wt.% Pt/C and FeMn@BNPCFs-900 catalysts.

The turnover frequency (TOF) values of the optimal catalyst were calculated from the **Equation S3**. We first measured the Fe and Mn contents on the surfaces of FeMn@BNPCFs-900; for this, 1 mg of FeMn@BNPCFs-900 were first washed in the strong acid and further detected *via* the ICP technology. The ICP measurement results display that the mole numbers of Fe and Mn atoms on the surfaces of 1 mg FeMn@BNPCFs-900 sample are  $6.875 \times 10^{-4}$  mmol and  $2.0618 \times 10^{-3}$  mmol, respectively; demonstrating the most Fe<sub>3</sub>C nanoparticles were imbedded into carbon layers. XPS test results have proved that the mole numbers of B and N elements in 1 mg of FeMn@BNPCFs-900 are  $1.43 \times 10^{-4}$  mmol and  $3.0438 \times 10^{-4}$  mmol, respectively. Assuming all Fe, Mn, B and N atoms dispersed along FeMn@BNPCFs-900's surfaces are catalytically active toward HER, the TOF values of the optimal

FeMn@BNPCFs-900 and 20 wt.% Pt/C catalysts were then calculated between -0.5 and 0.20 V *vs.* RHE in a 1.0 M KOH (as shown in **Figure S13**). The TOF values of FeMn@BNPCFs-900 calculated in the as-chosen potential range are all smaller than those of the 20 wt.% Pt/C catalyst.

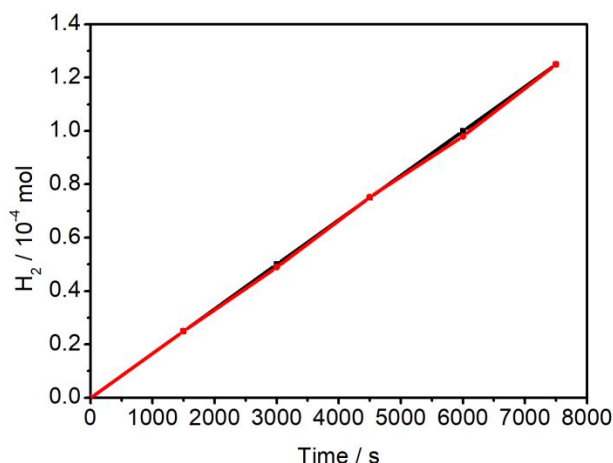

**Figure S14.** Amount of theoretically calculated (black) and experimentally measured (red) hydrogen versus time of FeMn@BNPCFs-900 under a static over-potential of 300 mV *vs.* RHE.

The generated gas was analyzed by gas chromatography (GC) analysis. The generated hydrogen was measured quantitatively using a calibrated pressure sensor to monitor the changes in pressure in the cathode compartment of an H-type electrolytic cell. Potentiostatic cathodic electrolysis was performed by maintaining a FeMn@BNPCFs-900 modified glassy carbon electrode at the over-potential of 300 mV for 7500 seconds. To calculate the Faradaic efficiency (FE) of the electrocatalytic hydrogen evolution process, we compared the amount of experimentally quantified hydrogen with the theoretically calculated hydrogen (assuming 100% FE). The agreement between both the theoretically and experimentally measured values suggests an FE of close to 100% (**Figure S14**).

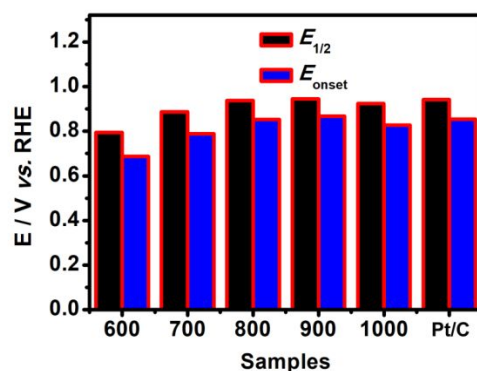

**Figure S15.** The corresponding ORR  $E_{onset}$  and  $E_{1/2}$  values for the FeMn@BNPCFs-600, FeMn@BNPCFs-700, FeMn@BNPCFs-800, FeMn@BNPCFs-900, FeMn@BNPCFs-1000 and 20 wt.% Pt/C samples.

**Table S3** A comparison on ORR catalytic data between our resultant catalysts and other reported non-precious metal based ORR catalysts.

| Catalysts                                  | $E_{onset}$<br>(V vs. RHE) | $E_{1/2}$<br>(V vs. RHE) | $j_L$<br>(mA cm <sup>-2</sup> ) | Medium    | References                                                        |
|--------------------------------------------|----------------------------|--------------------------|---------------------------------|-----------|-------------------------------------------------------------------|
| FeMn@BNPCFs-600                            | 0.795                      | 0.688                    | -4.507                          | 0.1 M KOH | This work                                                         |
| FeMn@BNPCFs-700                            | 0.887                      | 0.789                    | -4.924                          | 0.1 M KOH |                                                                   |
| FeMn@BNPCFs-800                            | 0.938                      | 0.853                    | -5.776                          | 0.1 M KOH |                                                                   |
| FeMn@BNPCFs-900                            | 0.946                      | 0.868                    | -5.976                          | 0.1 M KOH |                                                                   |
| FeMn@BNPCFs-1000                           | 0.925                      | 0.827                    | -5.310                          | 0.1 M KOH |                                                                   |
| 20 wt.% Pt/C                               | 0.943                      | 0.854                    | -5.449                          | 0.1 M KOH |                                                                   |
| Fe@Mn13-polymer                            | 0.78                       | 0.7                      | -2.5                            | 0.1 M KOH | <i>Dalton Trans.</i> <b>2019</b> , 48,4794-4797                   |
| Fe <sub>3</sub> Mn <sub>3</sub> N-FGC      | 1.03                       | 0.89                     | -6.47                           | 0.1 M KOH | <i>Inorg. Chem.</i> <b>2020</b> , 59, 5194-5205                   |
| Fe <sub>3</sub> Mn-N/C-900                 | 0.934                      | -                        | -6.1                            | 0.1 M KOH | <i>J. Mater. Chem. A</i> <b>2018</b> , 6, 13254-13262             |
| Fe/Mn-N-C                                  | -                          | 0.9                      | -6.05                           | 0.1 M KOH | <i>Nature Commun.</i> <b>2015</b> , 6, 8618-8626                  |
| FeNC-1000                                  | -                          | 0.9                      | -5.8                            | 0.1 M KOH | <i>ACS. Appl. Mater. Interfaces</i> <b>2018</b> , 10, 10778-10785 |
| Mn@NPC-NH <sub>3</sub>                     | 0.95                       | 0.83                     | -5.69                           | 0.1 M KOH | <i>ACS. Sustainable. Chem. Eng.</i> <b>2020</b> , 8, 12618-12625  |
| Mn-Fe-N/S@mC                               | 0.93                       | 0.89                     | -6                              | 0.1 M KOH | <i>Nano Energy</i> <b>2019</b> , 63, 103851                       |
| Mn/C-NO                                    | 0.92                       | 0.86                     | -5.6                            | 0.1 M KOH | <i>Adv. Mater.</i> <b>2018</b> , 30, 1801732                      |
| Mn-N-C                                     | 0.98                       | 0.86                     | -5.8                            | 0.1 M KOH | <i>Int. J. Hydrogen Energ.</i> <b>2019</b> , 44, 26387-26395.     |
| BN-CDs@CNT                                 | 0.92                       | 0.8                      | -5.9                            | 0.1 M KOH | <i>J. Colloid Interface Sci.</i> <b>2021</b> , 600, 865-871       |
| CNx/CBx-GNRs                               | 0.8                        | -                        | -3.75                           | 0.1 M KOH | <i>ACS Appl. Mater. Interfaces</i> <b>2015</b> , 7, 7786-7794     |
| Mn <sub>2</sub> Co <sub>3</sub> -900       | 0.91                       | 0.76                     | -5.8                            | 0.1 M KOH | <i>J. Mater. Chem. A</i> <b>2019</b> , 7, 20649-20657.            |
| Fe <sub>3</sub> Mn <sub>1</sub> /NCNTs-100 | 0.91                       | 0.86                     | -5.4                            | 0.1 M KOH | <i>ChemCatChem</i> <b>2018</b> , 10, 5475-5486.                   |



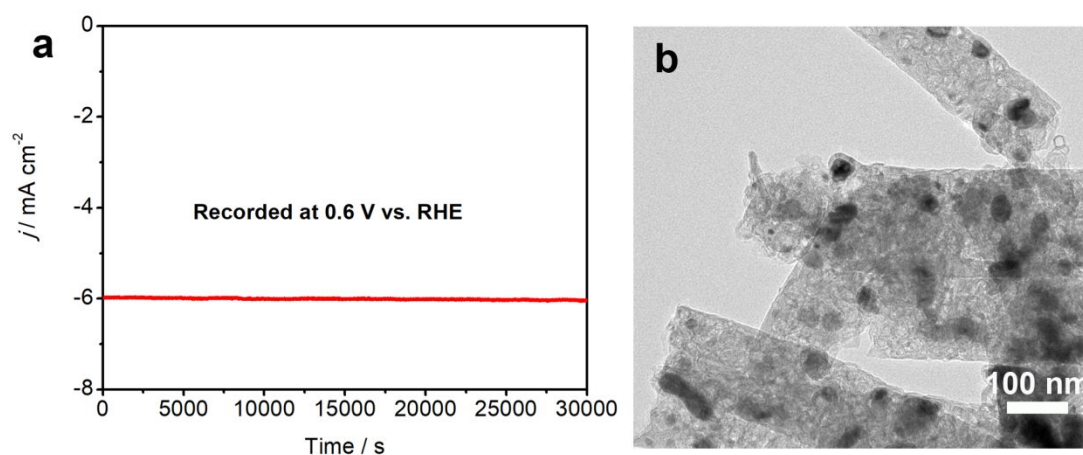

**Figure S16.** (a) Time dependence of the current density for FeMn@BNPCFs-900 at a static potential of 0.6 V vs. RHE for 30000 s in O<sub>2</sub>-saturated 0.1 M KOH. (b) TEM image of the FeMn@BNPCFs-900 sample after the accelerated durability test in O<sub>2</sub>-saturated 0.1 M KOH solution.

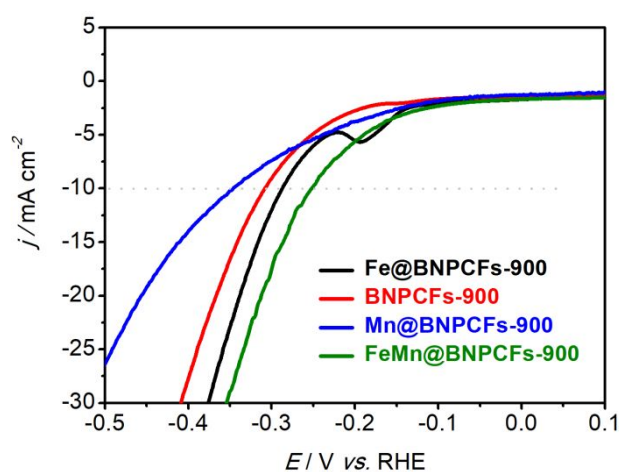

**Figure S17.** The HER LSV polarization curves recorded in 1.0 M KOH for FeMn@BNPCFs-900, Fe@BNPCFs-900, Mn@BNPCFs-900 and BNPCFs-900 control samples.

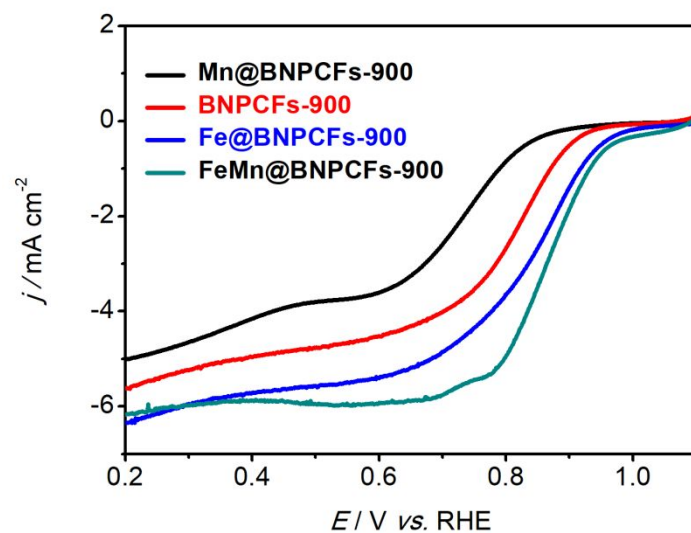

**Figure S18.** The ORR LSV polarization curves recorded in 0.1 M KOH for FeMn@BNPCFs-900, Fe@BNPCFs-900, Mn@BNPCFs-900 and BNPCFs-900 control samples.
